# Supplementary material
Source: PubMed Central journal article supplement (PMC10265693)

Supplemental

Supplement Table 1S. Patient characteristics, Adjuvant cohort

‡Pathologic tumor size and node status

\*Obesity defined as BMI  $\geq$  30kg/m<sup>2</sup>

|                        | <b>All<br/>N=7,485</b> | <b>White<br/>N=6,693 (89.4%)</b> | <b>Black<br/>N=792 (10.6%)</b> | <b>P-value</b> |
|------------------------|------------------------|----------------------------------|--------------------------------|----------------|
| Age, mean (SD)         | 49.5 (10.0)            | 49.8 (10.0)                      | 47.5 (9.9)                     | <0.0001        |
| ER status, count (%)   |                        |                                  |                                | <0.0001        |
| Negative               | 2702 (36.1)            | 2320 (34.7)                      | 382 (48.2)                     |                |
| Positive               | 4030 (53.8)            | 3711 (55.4)                      | 319 (40.3)                     |                |
| Unknown                | 753 (10.1)             | 662 (9.9)                        | 91 (11.5)                      |                |
| Node status, count (%) |                        |                                  |                                | <0.0001        |
| Negative               | 1175 (15.7)            | 1010 (15.1)                      | 165 (20.8)                     |                |
| Positive               | 6241 (83.4)            | 5626 (84.1)                      | 615 (77.7)                     |                |
| Unknown                | 69 (0.9)               | 57 (0.9)                         | 12 (1.5)                       |                |
| Tumor size, count (%)  |                        |                                  |                                | 0.0083         |
| <2cm                   | 3117 (41.6)            | 2819 (42.1)                      | 298 (37.6)                     |                |
| $\geq$ 2cm             | 4136 (55.3)            | 3677 (54.9)                      | 459 (58.0)                     |                |
| Unknown                | 232 (3.1)              | 197 (2.9)                        | 35 (4.4)                       |                |
| Obesity                |                        |                                  |                                | <0.0001        |
| No                     | 5282 (70.6)            | 4868 (72.7)                      | 414 (52.3)                     |                |
| Yes                    | 2201 (29.4)            | 1823 (27.2)                      | 378 (47.7)                     |                |
| Unknown                | 2 (0)                  | 2 (0)                            | --                             |                |
| Taxane, count(%)       |                        |                                  |                                | 0.1184         |
| Yes                    | 4457 (59.5)            | 3965 (59.2)                      | 492 (62.1)                     |                |
| No                     | 3028 (40.5)            | 2728 (40.8)                      | 300 (37.9)                     |                |

Supplement Figure 1S. Association between race and DRFS in adjuvant treatment cohort. A) Kaplan-Meier curve describing distant-relapse free survival in adjuvant treated cohort. Log-rank test were used to compare survival in White vs Black race patients. B) Cox-regression model adjusting for co-variables. C) Cox-regression model in ER-positive disease only. D) Cox-regression model in ER-negative disease only. Comparison groups: White race, node negative, tumor <2cm, BMI <30kg/m<sup>2</sup>, no taxane. Pathologic tumor size and node status were used.

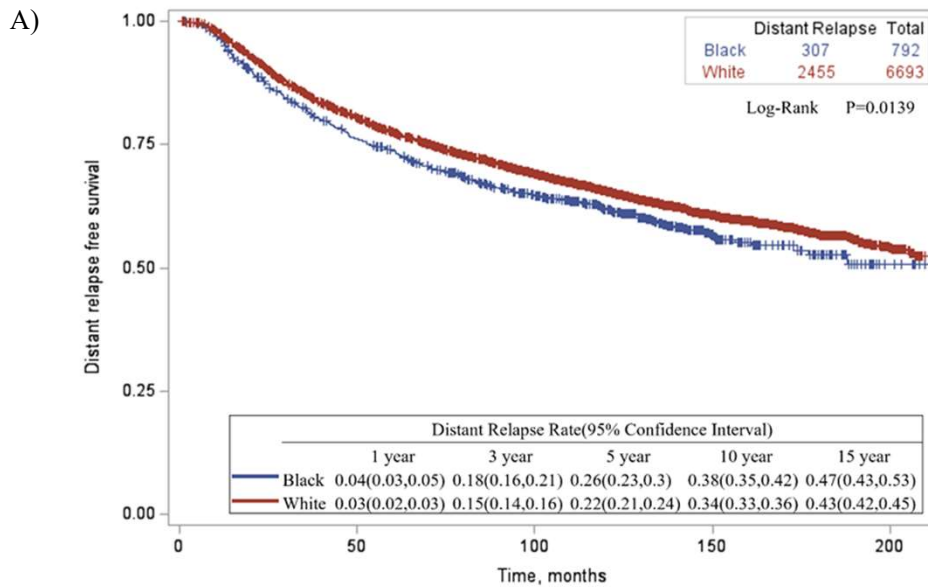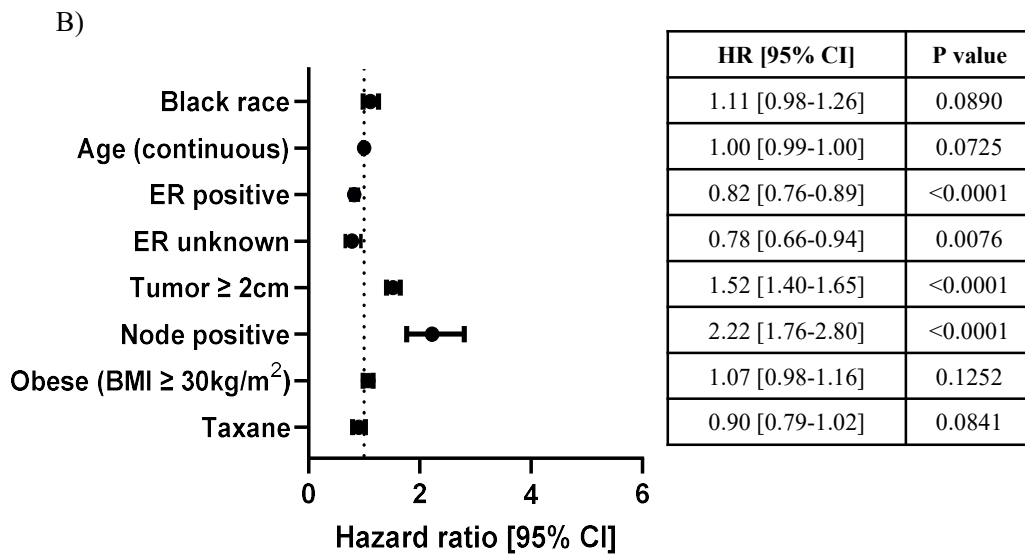

Supplement Figure 1S continued

C)

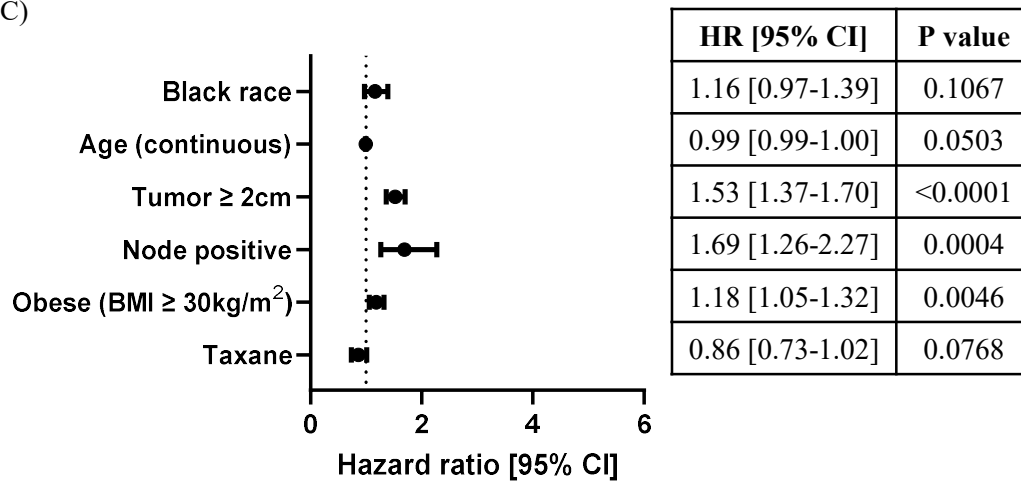

D)

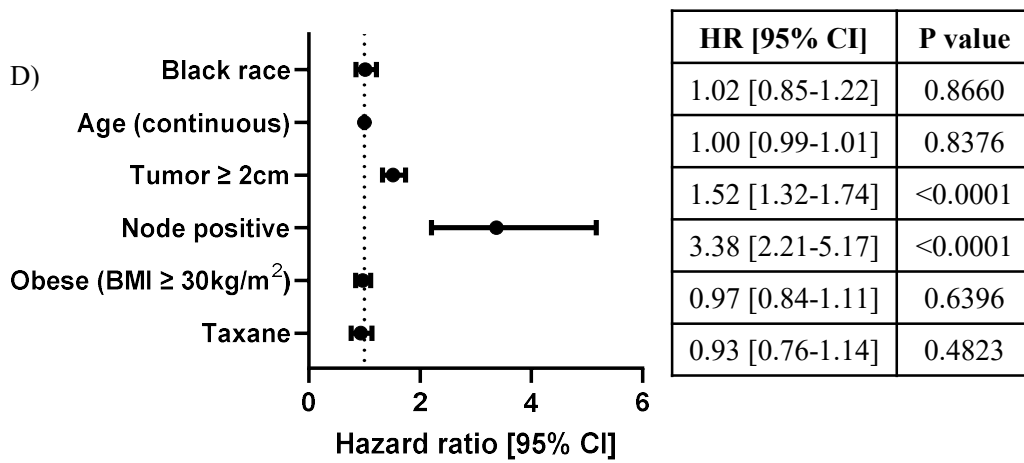

Supplement Table 2S. Patient characteristics, neoadjuvant cohort

‡Clinical (pre-treatment) tumor size and node status

\*Obesity defined as BMI  $\geq$  30kg/m<sup>2</sup>

|                        | <b>All (N=2,217)</b> | <b>White<br/>N=1,939 (87.5%)</b> | <b>Black<br/>N=278 (12.5%)</b> | <b>P-value</b> |
|------------------------|----------------------|----------------------------------|--------------------------------|----------------|
| Age, mean (SD)         | 49.2 (10.0)          | 49.4 (10.0)                      | 48 (10.3)                      | 0.0231         |
| ER status, count (%)   |                      |                                  |                                | <0.0001        |
| Negative               | 734 (33.1)           | 612 (31.6)                       | 122 (43.9)                     |                |
| Positive               | 912 (41.1)           | 840 (43.3)                       | 72 (25.9)                      |                |
| Unknown                | 571 (25.8)           | 487 (25.1)                       | 84 (30.2)                      |                |
| Node status, count (%) |                      |                                  |                                | 0.0807         |
| Negative               | 1528 (68.9)          | 1349 (69.6)                      | 179 (64.4)                     |                |
| Positive               | 689 (31.1)           | 590 (30.4)                       | 99 (35.6)                      |                |
| Tumor size, count (%)  |                      |                                  |                                | 0.0067         |
| <2cm                   | 148 (6.7)            | 140 (7.2)                        | 8 (2.9)                        |                |
| $\geq$ 2cm             | 2,069 (93.3)         | 1799 (92.8)                      | 270 (97.1)                     |                |
| Obesity                |                      |                                  |                                | <0.0001        |
| No                     | 1563 (70.5)          | 1425 (73.5)                      | 138 (49.6)                     |                |
| Yes                    | 654 (29.5)           | 514 (26.5)                       | 140 (50.4)                     |                |
| Taxane, count(%)       |                      |                                  |                                | 0.4478         |
| No                     | 1346 (60.7)          | 1183 (61.0)                      | 163 (58.6)                     |                |
| Yes                    | 871 (39.3)           | 756 (39.0)                       | 115 (41.4)                     |                |
| pCR                    |                      |                                  |                                | 0.0051         |
| No                     | 1731 (78.1)          | 1533 (79.1)                      | 198 (71.2)                     |                |
| Yes                    | 394 (17.8)           | 333 (17.2)                       | 61 (21.9)                      |                |
| Unknown                | 92 (4.1)             | 73 (3.8)                         | 19 (6.8)                       |                |

Supplement Figure 2S. Association between race and DRFS in neoadjuvant treatment cohort. A) Kaplan-Meier curve describing distant-relapse free survival in neoadjuvant treated cohort. Log-rank and Wilcoxon tests were used to compare survival in White vs Black race patients. B) Cox-regression model adjusting for co-variates. Comparison groups: White race, ER-negative, node negative, tumor <2cm, BMI <30kg/m<sup>2</sup>, no taxane. Clinical tumor size and node status were used.

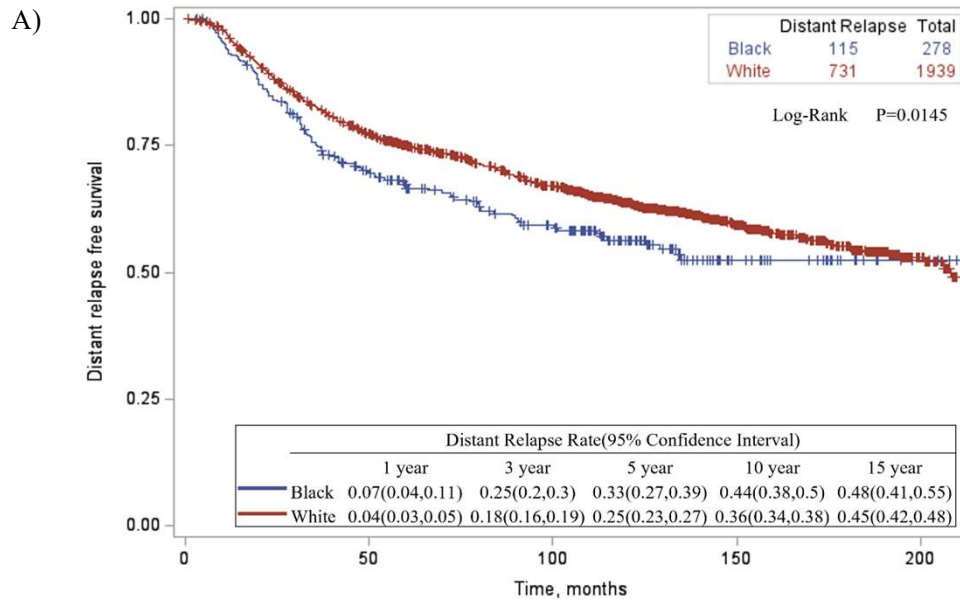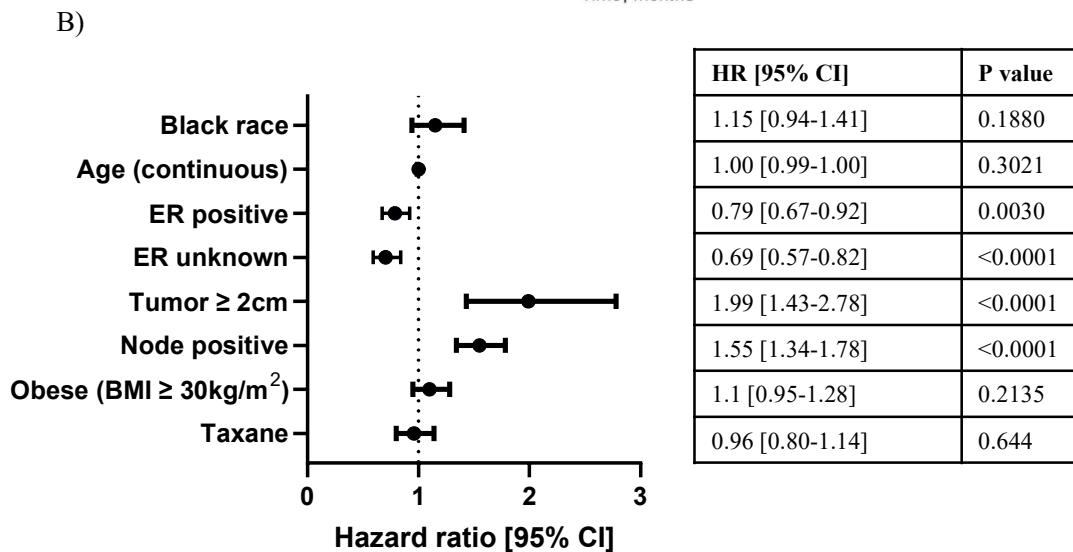

Supplemental Table 3S: List of the eight NSABP trials and the accrual dates of each trial.

| <b>NSABP Trials</b> | <b>Accrual Dates</b>  |
|---------------------|-----------------------|
| 15                  | 10/01/1984-10/14/1988 |
| 18                  | 10/17/1988-04/30/1993 |
| 22                  | 07/05/1989-05/31/1991 |
| 23                  | 05/12/1991-12/31/1998 |
| 27                  | 12/20/1995-12/29/2000 |
| 28                  | 08/01/1995-05/22/1998 |
| 30                  | 03/15/1999-03/31/2004 |
| 40                  | 11/20/2006-06/30/2010 |

Supplemental Table 4S: Analysis of age as a continuous and categorical variable did not affect the results of the study significantly. Obesity lost significance when age was analyzed as a categorical variable.

|                                           | <b>Age as continuous variable</b> |                | <b>Age as categorical variable</b> |                |
|-------------------------------------------|-----------------------------------|----------------|------------------------------------|----------------|
|                                           | <b>HR (95% CI)</b>                | <b>P value</b> | <b>HR (95% CI)</b>                 | <b>P value</b> |
| <b>Race (Black vs White)</b>              | 1.13 (1.01,1.25)                  | 0.03           | 1.13 (1.02, 1.26)                  | 0.0212         |
| <b>ER Status</b>                          |                                   |                |                                    |                |
| Unknown v Negative                        | 0.73 (0.65, 0.83)                 | <0.0001        | 0.73 (0.64, 0.82)                  | <0.0001        |
| Positive vs Negative                      | 0.82 (0.76, 0.88)                 | <0.0001        | 0.81 (0.75, 0.87)                  | <0.0001        |
| <b>Node Status (Positive vs Negative)</b> | 1.71 (1.52,1.93)                  | <0.0001        | 1.72 (1.53, 1.93)                  | <0.0001        |
| <b>Tumor Size (≥ 2cm vs. ≤ 2cm)</b>       | 1.54 (1.42, 1.67)                 | <0.0001        | 1.54 (1.42, 1.67)                  | <0.0001        |
| <b>Obese vs. Non-Obese</b>                | 1.08 (1.00, 1.16)                 | 0.0431         | 1.07 (0.99, 1.15)                  | 0.0697         |
| <b>Taxane vs No Taxane</b>                | 0.92 (0.83, 1.01)                 | 0.0898         | 0.91 (0.83, 1.01)                  | 0.0865         |
| <b>Age</b>                                | 0.99 (0.99, 1.00)                 | 0.0501         | 1.00 (0.94, 1.08)                  | 0.8598         |
| <b>NAC vs AC</b>                          | 1.09 (0.93, 1.29)                 | 0.2768         | 1.09 (0.93, 1.29)                  | 0.2842         |

Table 5S. Testing of Interaction in the entire cohort of Race and ER status.

|                                           | <b>HR (95% CI)</b> | <b>P Value</b> |
|-------------------------------------------|--------------------|----------------|
| <b>Race</b>                               |                    | 0.7626         |
| <b>Black vs White At ER=Unknown</b>       | 1.39 (1.05, 1.84)  |                |
| <b>Black vs White At ER=Positive</b>      | 1.24 (1.05, 1.45)  |                |
| <b>Black vs White At ER=Negative</b>      | 0.98 (0.83, 1.14)  |                |
| <b>ER Status</b>                          |                    | <.0001         |
| <b>Unknown vs Negative At Race=Black</b>  | 0.99 (0.74, 1.34)  |                |
| <b>Positive vs Negative At Race=Black</b> | 1.01 (0.82, 1.25)  |                |
| <b>Unknown vs Negative At Race=White</b>  | 0.70 (0.61, 0.80)  |                |
| <b>Positive vs Negative At Race=White</b> | 0.79 (0.74, 0.86)  |                |
| <b>Race*ER</b>                            | -                  | 0.0338         |
| <b>Node Status(Positive vs Negative)</b>  | 1.72 (1.53, 1.93)  | <.0001         |
| <b>Tumor Size(&gt;=2cm vs &lt;2cm)</b>    | 1.54 (1.42, 1.67)  | <.0001         |
| <b>Obese vs Non-obese</b>                 | 1.08 (1.01, 1.17)  | 0.0336         |
| <b>Taxane vs No Taxane</b>                | 0.92 (0.83, 1.01)  | 0.0882         |
| <b>Age Unit=1</b>                         | 0.99 (0.99, 1.00)  | 0.0479         |
| <b>NAC vs AC</b>                          | 1.09 (0.93, 1.29)  | 0.2812         |

Table 6S. Testing of Interaction in the NAC cohort without pCR of Race and ER status.

|                                           | <b>HR (95% CI)</b> | <b>P Value</b> |
|-------------------------------------------|--------------------|----------------|
| <b>Race</b>                               |                    | 0.8284         |
| <b>Black vs White At ER=Unknown</b>       | 1.48 (0.94, 2.35)  |                |
| <b>Black vs White At ER=Positive</b>      | 1.55 (1.06, 2.26)  |                |
| <b>Black vs White At ER=Negative</b>      | 0.96 (0.69, 1.35)  |                |
| <b>ER Status</b>                          |                    | 0.0002         |
| <b>Unknown vs Negative At Race=Black</b>  | 1.10 (0.65, 1.85)  |                |
| <b>Positive vs Negative At Race=Black</b> | 1.13 (0.71, 1.81)  |                |
| <b>Unknown vs Negative At Race=White</b>  | 0.71 (0.57, 0.90)  |                |
| <b>Positive vs Negative At Race=White</b> | 0.70 (0.59, 0.84)  |                |
| <b>Race*ER Status</b>                     | -                  | 0.1252         |
| <b>Node Status(Positive vs Negative)</b>  | 1.61 (1.38, 1.88)  | <.0001         |
| <b>Tumor Size(&gt;=2cm vs &lt;2cm)</b>    | 1.93 (1.33, 2.79)  | 0.0005         |
| <b>Obese vs No obese</b>                  | 1.11 (0.94, 1.31)  | 0.2135         |
| <b>Taxane vs No Taxane</b>                | 0.97 (0.80, 1.17)  | 0.7316         |
| <b>Age Unit=1</b>                         | 0.99 (0.99, 1.00)  | 0.1525         |



# Appendix

Appendix 1: Summary of NSABP protocols included in study

Abbreviations: ER = estrogen receptor PR = progesterone receptor HER2 = human epidermal growth factor receptor 2 TAM = tamoxifen RT = radiation therapy

| Adjuvant trials    |                                                                                                  |                                                                                |                                                                                                                                                                                                             |                                                             |                                                            |
|--------------------|--------------------------------------------------------------------------------------------------|--------------------------------------------------------------------------------|-------------------------------------------------------------------------------------------------------------------------------------------------------------------------------------------------------------|-------------------------------------------------------------|------------------------------------------------------------|
| Trial              | Selection                                                                                        | Stratification                                                                 | Treatment                                                                                                                                                                                                   | No patients                                                 |                                                            |
| B-15 arm 1         | Total mastectomy or lumpectomy + axillary dissection + XRT<br>Age <= 49 or age 50-59 with PR <10 | Number positive nodes<br>Type of operation<br>Quantitative PR                  | Adriamycin 60mg/m <sup>2</sup> IV + cyclophosphamide 600 mg/m <sup>2</sup> IV q21 days x 4 cycles                                                                                                           | Total<br>White (%)<br>Black (%)<br>Other (%)<br>Unknown (%) | 767<br>639 (83.3%)<br>85 (11.1%)<br>30 (3.9%)<br>13 (1.7%) |
| B-18 arm 1         | Patients with operable breast cancer                                                             | Age<br>Clinical tumor size<br>Clinical node status                             | Adriamycin 60mg/m <sup>2</sup> IV cyclophosphamide 600 mg/m <sup>2</sup> IV q 21 days x 4 cycles<br>+TAM x 5yrs if >= 50 yo                                                                                 | Total<br>White (%)<br>Black (%)<br>Other (%)<br>Unknown (%) | 751<br>607 (80.8)<br>85 (11.3)<br>52 (6.9)<br>7 (0.9)      |
| B-22 arm 1         | Operable breast cancer, histologically positive axillary nodes                                   | Nodes<br>Age<br>ER<br>Operation                                                | Adriamycin 60mg/m <sup>2</sup> IV cyclophosphamide 600 mg/m <sup>2</sup> IV q 21 days x 4 cycles<br>+TAM x 5yrs if >= 50 yo                                                                                 | Total<br>White (%)<br>Black (%)<br>Other (%)<br>Unknown (%) | 755<br>663 (87.8)<br>64 (8.5)<br>23 (3.1)<br>5 (0.7)       |
| B-23 arm 3&4       | Histologically negative axillary nodes<br>ER negative                                            | Age<br>Clinical tumor size<br>Operation                                        | Adriamycin 60mg/m <sup>2</sup> IV cyclophosphamide 600 mg/m <sup>2</sup> IV q21 days x 4 cycles<br>+TAM or placebo                                                                                          | Total<br>White (%)<br>Black (%)<br>Other (%)<br>Unknown (%) | 970<br>759 (78.2)<br>142 (14.6)<br>55 (5.7)<br>14 (1.4)    |
| B-28 arm 1         | Operative breast cancer<br>Pathologically positive nodes                                         | Number of positive nodes<br>Tamoxifen<br>Type of surgery                       | Adriamycin 60mg/m <sup>2</sup> IV cyclophosphamide 600 mg/m <sup>2</sup> IV q21 days x 4 cycles<br>+TAM if ER/PR pos or >=50                                                                                | Total<br>White (%)<br>Black (%)<br>Other (%)<br>Unknown (%) | 1515<br>1297 (85.6)<br>116 (7.7)<br>97 (6.4)<br>5 (0.3)    |
| B-28 arm 2         | Operative breast cancer<br>Pathologically positive nodes                                         | Number of positive nodes<br>Tamoxifen<br>Type of surgery                       | Adriamycin 60mg/m <sup>2</sup> IV cyclophosphamide 600 mg/m <sup>2</sup> IV q21 days x 4 cycles<br>Followed by paclitaxel 225 mg/m <sup>2</sup> IV q21 days x 4 cycles<br>+TAM if ER/PR pos or >=50         | Total<br>White (%)<br>Black (%)<br>Other (%)<br>Unknown (%) | 1521<br>1296 (85.2)<br>122 (8.0)<br>97 (6.3)<br>6 (0.4)    |
| B-30 arm 1         | Operable breast cancer<br>Histologically positive nodes                                          | Number of positive nodes<br>Tamoxifen<br>Surgery/RT                            | Adriamycin 60mg/m <sup>2</sup> IV cyclophosphamide 600 mg/m <sup>2</sup> IV q21 days x 4 cycles followed by docetaxel 100 mg/m <sup>2</sup> q 21 days x 4 cycles<br>+TAM if ER/PR pos                       | Total<br>White (%)<br>Black (%)<br>Other (%)<br>Unknown (%) | 1740<br>1433 (82.4)<br>178 (10.2)<br>129 (7.4)<br>0 (0.0)  |
| Neoadjuvant trials |                                                                                                  |                                                                                |                                                                                                                                                                                                             |                                                             |                                                            |
| B-18 arm 2         | Patients with operable breast cancer                                                             | Age<br>Clinical tumor size<br>Clinical nodal status                            | Adriamycin 60mg/m <sup>2</sup> IV cyclophosphamide 600 mg/m <sup>2</sup> IV q 21 days x 4 cycles (unless clinical progression, in which case chemo was completed post op (n=21))<br>+TAM x 5yrs if >= 50 yo | Total<br>White (%)<br>Black (%)<br>Other (%)<br>Unknown (%) | 742<br>604 (81.4)<br>68 (9.2)<br>59 (8.0)<br>11 (1.5)      |
| B-27 arm 1         | Operable breast cancer : T1c-3N0M0, T1-3N1M0                                                     | Age<br>Tumor size<br>Clinical nodal status                                     | Adriamycin 60mg/m <sup>2</sup> IV cyclophosphamide 600 mg/m <sup>2</sup> IV q21 days x 4 cycles<br>+TAM regardless of hormone status                                                                        | Total<br>White (%)<br>Black (%)<br>Other (%)<br>Unknown (%) | 785<br>579 (73.8)<br>95 (12.1)<br>89 (11.3)<br>22 (2.8)    |
| B-27 arm 2         | Operable breast cancer : T1c-3N0M0, T1-3N1M0                                                     | Age<br>Tumor size<br>Clinical nodal status                                     | Adriamycin 60mg/m <sup>2</sup> IV cyclophosphamide 600 mg/m <sup>2</sup> IV q21 days x 4 cycles<br>Followed by docetaxel 100mg/m <sup>2</sup> q21 days x 4 cycles<br>+TAM regardless of hormone status      | Total<br>White (%)<br>Black (%)<br>Other (%)<br>Unknown (%) | 783<br>595 (76.0)<br>90 (11.5)<br>81 (10.3)<br>17 (2.2)    |
| B-40 arm 1A        | HER2 neg invasive breast cancer diagnosed by core needle biopsy with palpable breast mass >= 2cm | Clinical tumor size<br>Clinical nodal status<br>Hormone receptor status<br>Age | Docetaxel 100mg/m <sup>2</sup> IV q21 days x4 cycles followed by Adriamycin 60mg/m <sup>2</sup> IV cyclophosphamide 600 mg/m <sup>2</sup> IV q 21 days x 4 cycles<br>+TAM if ER/PR pos                      | Total<br>White (%)<br>Black (%)<br>Other (%)<br>Unknown (%) | 193<br>161 (83.4)<br>25 (13.0)<br>3 (1.6)<br>4 (2.1)       |

Appendix 2. a) Kaplan-Meier curve describing survival in entire cohort adjusted for adjuvant vs neoadjuvant treatment, age, tumor size, node status, ER status, obesity, taxane, and protocol. B) Kaplan-Meier curve describing survival in adjuvant treated group adjusted for age, tumor size, node status, ER status, obesity, taxane, and protocol. C) Kaplan-Meier curve describing survival in the neoadjuvant treated group adjusted for age, tumor size, node status, ER status, obesity, taxane, and protocol. Adjusted Log-rank test was used to compare DRFS in Blacks vs Whites.

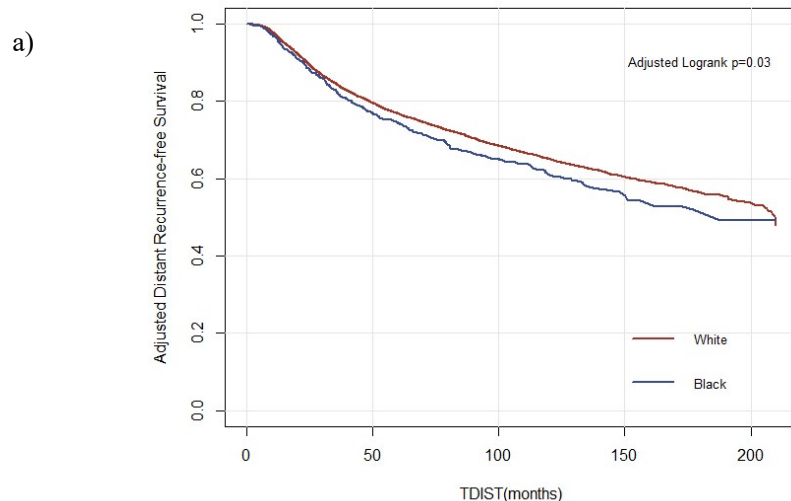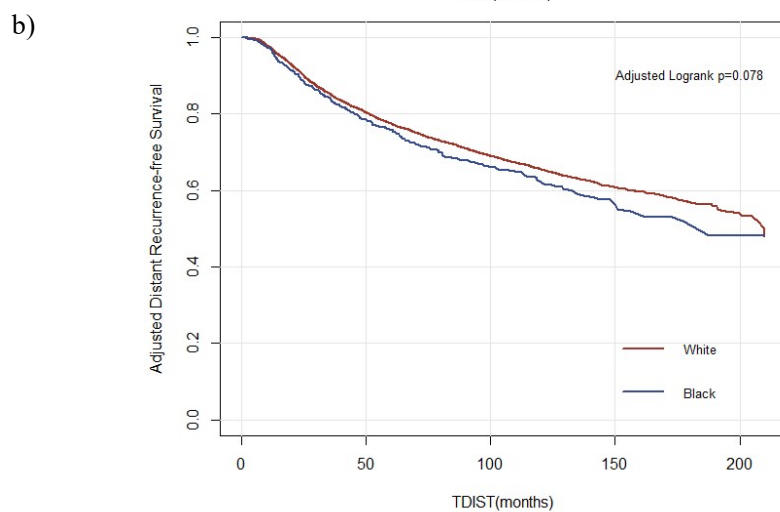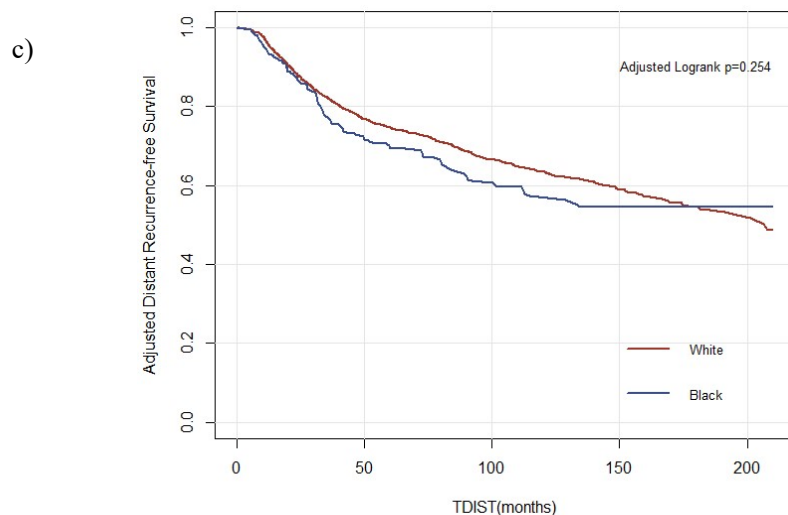

Supplement: NIHMS1889688-supplement-Supinfo.pdf [file NIHMS1889688-supplement-Supinfo.pdf]
